# Supplementary material
Source: HighWire-hosted journal article supplement (https://bmjopengastro.bmj.com/content/10/1/e001003)

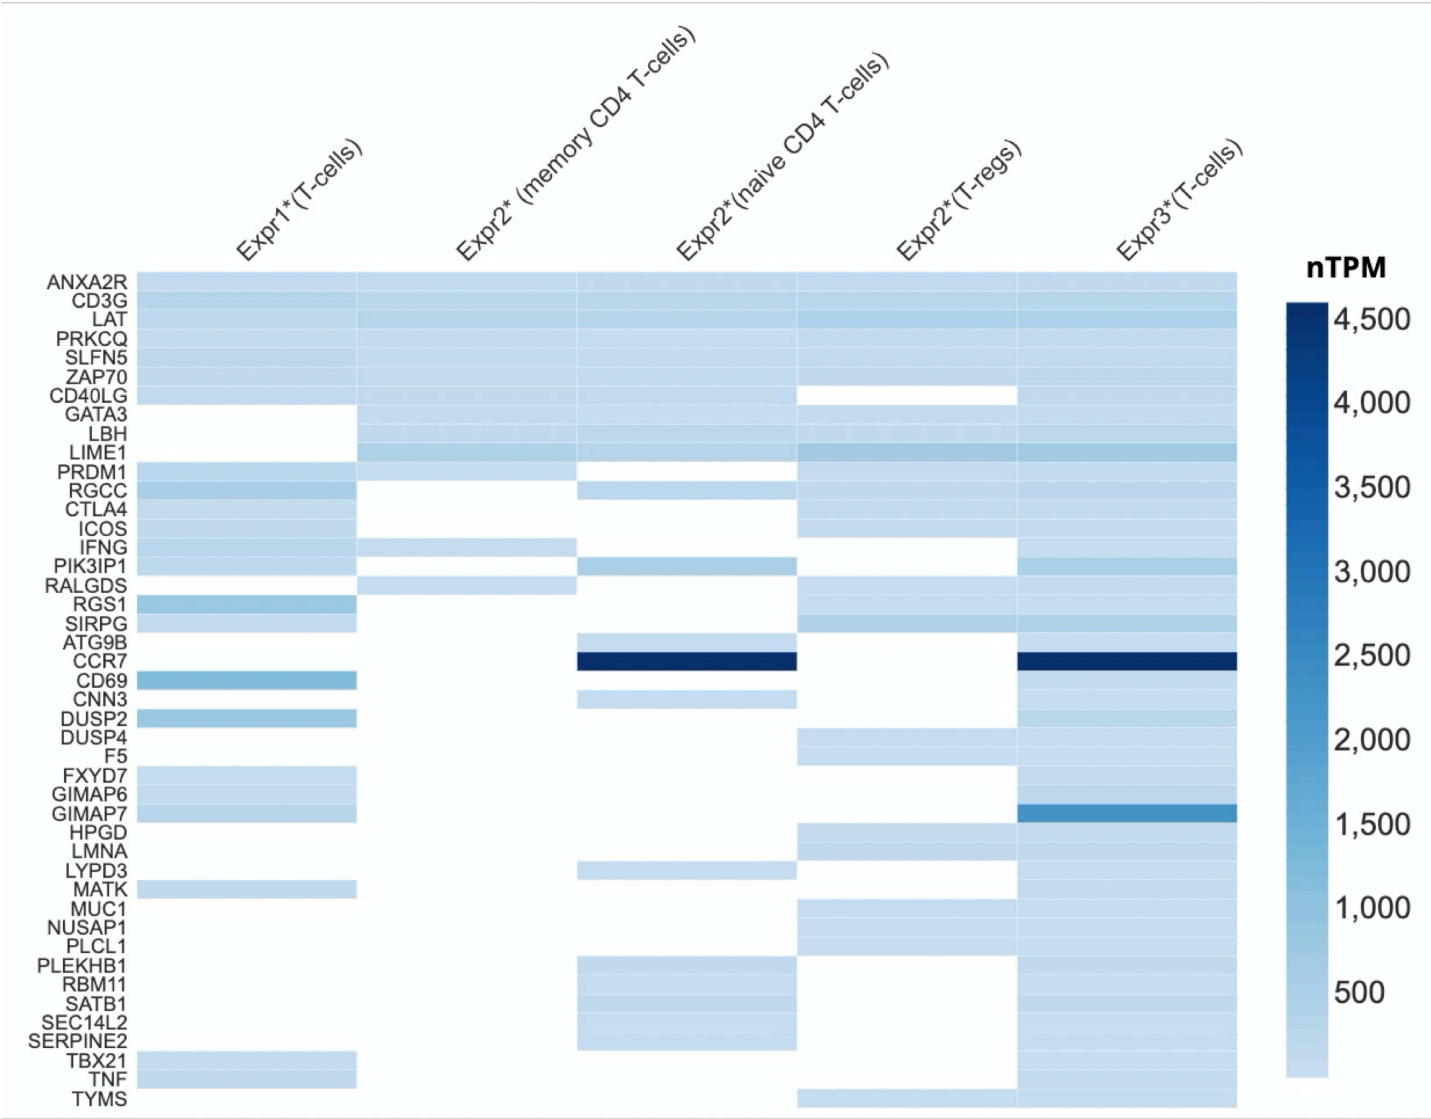

Supplement: inline-supplementary-material-15 [file inline-supplementary-material-15.pdf]
